# Supplementary material
Source: PubMed Central journal article supplement (PMC5697900)
Supplement: NIHMS874380-supplement-2.pdf [file NIHMS874380-supplement-2.pdf]

### Supplementary Table 1: Nomenclature of risk variants

| Experiment                    | Control                                                                                       |                                                              | Risk                                                                                          |                                                             | Figure      |
|-------------------------------|-----------------------------------------------------------------------------------------------|--------------------------------------------------------------|-----------------------------------------------------------------------------------------------|-------------------------------------------------------------|-------------|
|                               | Protein                                                                                       | Genotype Nomenclature                                        | Protein                                                                                       | Genotype Nomenclature                                       |             |
| Primary Human PBMCs           | IFIH1 <sup>Ala946/Ala946</sup>                                                                | <i>IFIH1</i> <sup>NR/NR</sup>                                | IFIH1 <sup>Thr946/Thr946</sup>                                                                | <i>IFIH1</i> <sup>R/R</sup>                                 | Figure 1A-C |
| Primary Human PBMCs           | IFIH1 <sup>Arg843/Arg843</sup> IFIH1 <sup>Ala946/Ala946</sup>                                 | <i>IFIH1</i> <sup>NR/NR</sup>                                | IFIH1 <sup>Arg843/Arg843</sup> IFIH1 <sup>Thr946/Thr946</sup>                                 | <i>IFIH1</i> <sup>R/R</sup>                                 | Figure 1D-F |
| <i>In vitro</i> HEK293T cells | IFIH1 <sup>Arg843</sup> IFIH1 <sup>Ala946</sup>                                               | mIFIH1 <sup>NR</sup>                                         | IFIH1 <sup>Arg843</sup> IFIH1 <sup>Thr946</sup>                                               | mIFIH1 <sup>R</sup>                                         | Figure 2,6  |
| <i>In vivo</i> Murine model   | IFIH1 <sup>Arg843/Arg843</sup> IFIH1 <sup>Ala946/Ala946</sup>                                 | <i>Ifih1</i> <sup>NR/NR</sup>                                | IFIH1 <sup>Arg843/Arg843</sup> IFIH1 <sup>Thr946/Thr946</sup>                                 | <i>Ifih1</i> <sup>R/R</sup>                                 | Figure 3-4  |
| <i>In vivo</i> Murine model   | IFIH1 <sup>Arg843/Arg843</sup> IFIH1 <sup>Ala946/Ala946</sup> PTPN22 <sup>Arg619/Arg619</sup> | <i>Ifih1</i> <sup>NR/NR</sup> <i>Ptpn22</i> <sup>NR/NR</sup> | IFIH1 <sup>Arg843/Arg843</sup> IFIH1 <sup>Ala946/Thr946</sup> PTPN22 <sup>Arg619/Trp619</sup> | <i>Ifih1</i> <sup>NR/R</sup> <i>Ptpn22</i> <sup>NR/R</sup>  | Figure 5    |
|                               |                                                                                               |                                                              | IFIH1 <sup>Arg843/Arg843</sup> IFIH1 <sup>Ala946/Ala946</sup> PTPN22 <sup>Arg619/Trp619</sup> | <i>Ifih1</i> <sup>NR/NR</sup> <i>Ptpn22</i> <sup>NR/R</sup> |             |
|                               |                                                                                               |                                                              | IFIH1 <sup>Arg843/Arg843</sup> IFIH1 <sup>Ala946/Thr946</sup> PTPN22 <sup>Arg619/Arg619</sup> | <i>Ifih1</i> <sup>NR/R</sup> <i>Ptpn22</i> <sup>NR/NR</sup> |             |

**Supplementary Table 2. RT-PCR Primers**

| <b>Primer</b>      | <b>Sequence</b>               | <b>Ref</b> |
|--------------------|-------------------------------|------------|
| hu <i>HPRT</i> -F  | 5'-GTTGGATATAAGCCAGACTTTGTTG  |            |
| hu <i>HPRT</i> -R  | 5'-AGGGAAGCTGATAGTCTATAGGCT   |            |
| hu <i>IFNB1</i> -F | 5'-TGCTTCTCCACGACAGCTCTTT     |            |
| hu <i>IFNB1</i> -R | 5'-CCCATTCAATTGCCACAGGA       |            |
| ms <i>Ifnb1</i> -F | 5'-ATGAGTGGTGGTTGCAGGC        |            |
| ms <i>Ifnb1</i> -R | 5'-TGACCTTTCAAATGCAGTAGATTCA  |            |
| ms <i>Hprt</i> -F  | 5'-TTGCTGACCTGCTGGATTACA      |            |
| ms <i>Hprt</i> -R  | 5'-CCCCGTTGACTGACTGATCATTACA  |            |
| ms <i>Ifih1</i> -F | 5'-AGATCAACACCTGTGGTAACACC    |            |
| ms <i>Ifih1</i> -R | 5'-CTCTAGGGCCTCCACGAACA       |            |
| ms <i>Ifit1</i> -F | 5'-TGCTGAGATGGACTGTGAGG       | 1          |
| ms <i>Ifit1</i> -R | 5'-CTCCACTTTCAGAGCCTTCG       | 1          |
| ms <i>Isg15</i> -F | 5'-AAG CAG CCA GAA GCA GAC TC | 1          |
| ms <i>Isg15</i> -R | 5'-CAC CAA TCT TCT GGG CAA TC | 1          |
| ms <i>Mx1</i> -F   | 5'-GGC AGA CAC CAC ATA CAA CC | 1          |
| ms <i>Mx1</i> -R   | 5'-CCT CAG GCT AGA TGG CAA G  | 1          |

1. Buechler, M. B., Teal, T. H., Elkon, K. B. & Hamerman, J. A. Cutting edge: Type I IFN drives emergency myelopoiesis and peripheral myeloid expansion during chronic TLR7 signaling. *J. Immunol.* **190**, 886–891 (2013).
